# Supplementary material
Source: PubMed Central journal article supplement (PMC1570425)

**A**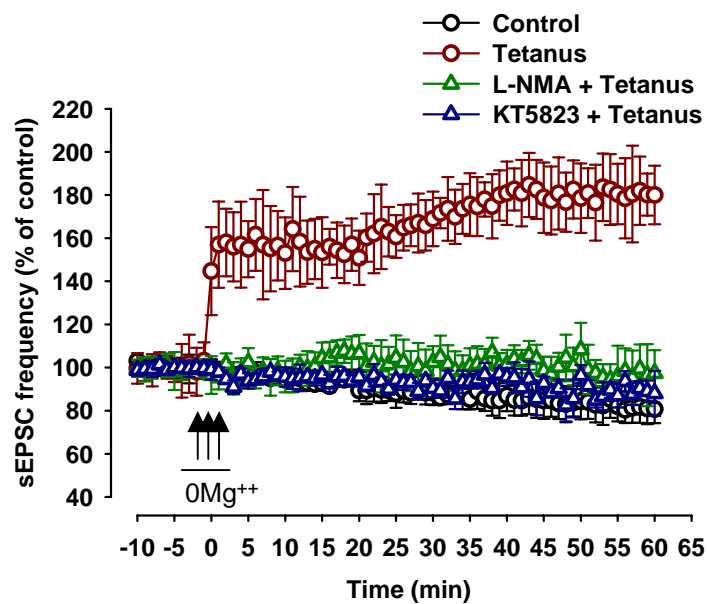**B**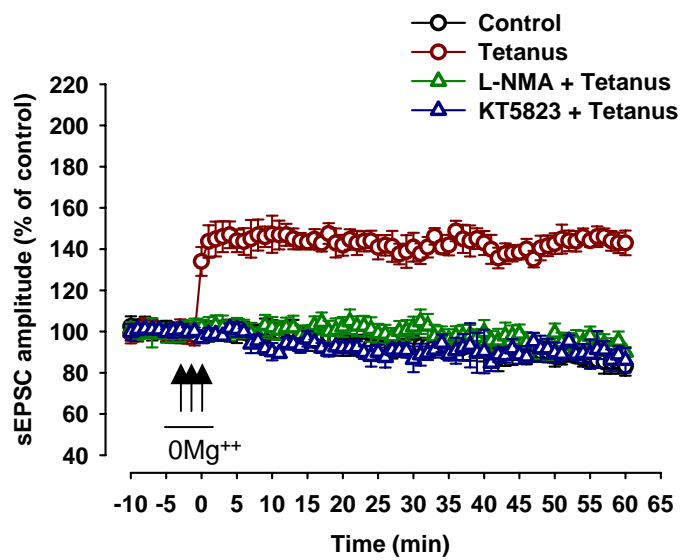**C**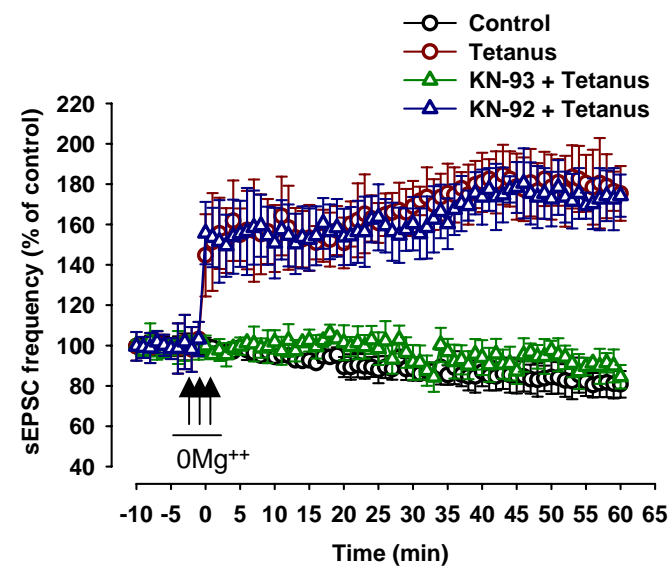**D**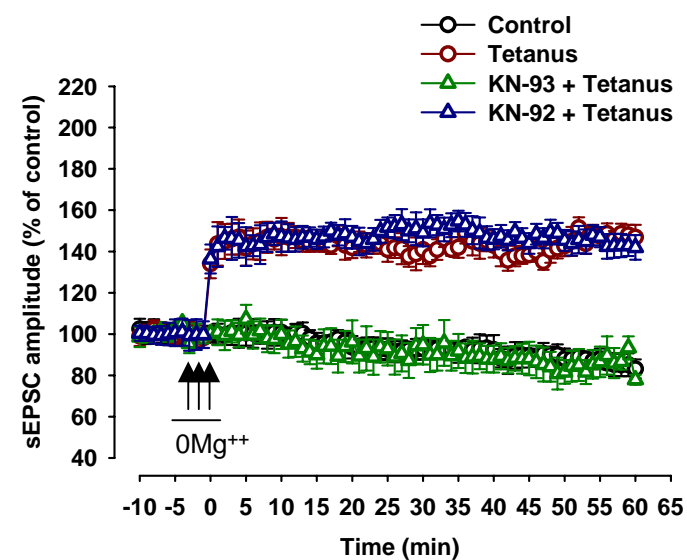**E**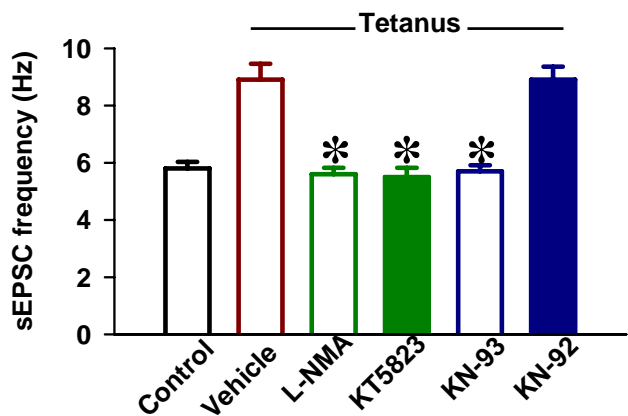**F**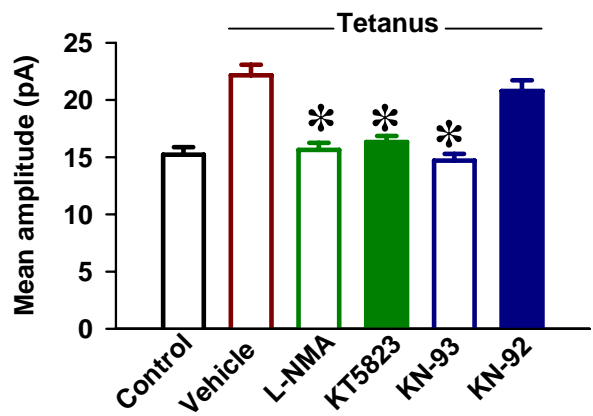

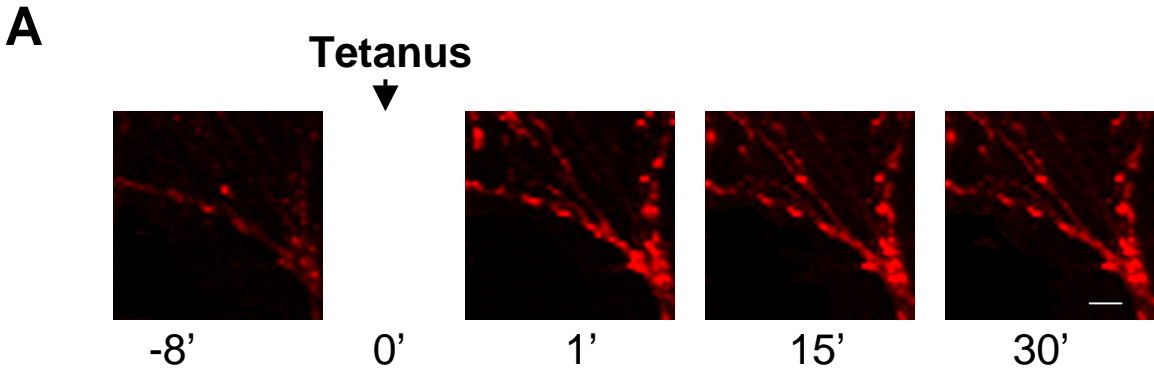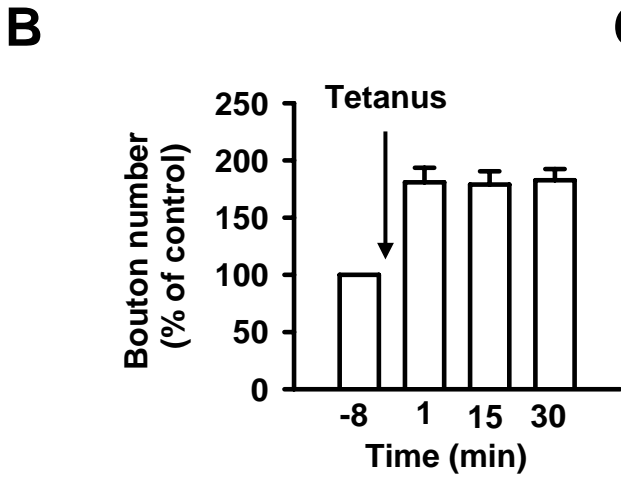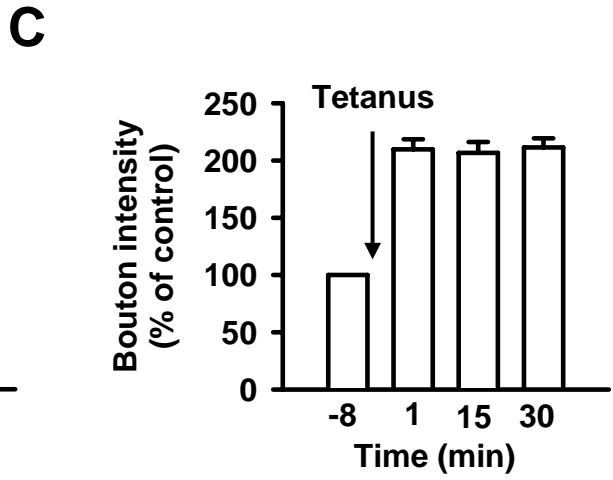

A

Tetanus, 0Mg<sup>++</sup>

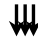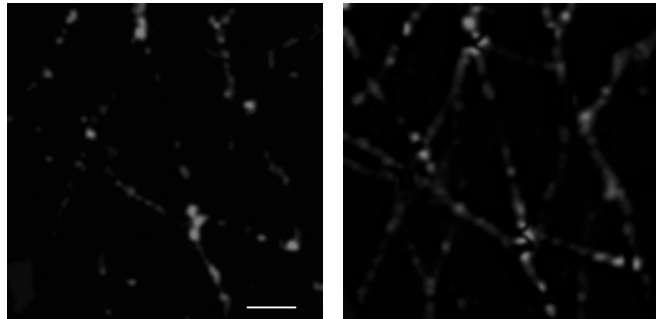

B

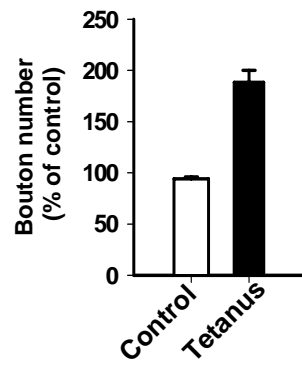

C

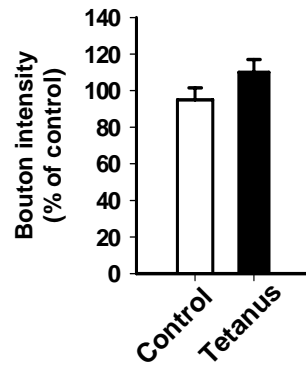

**A**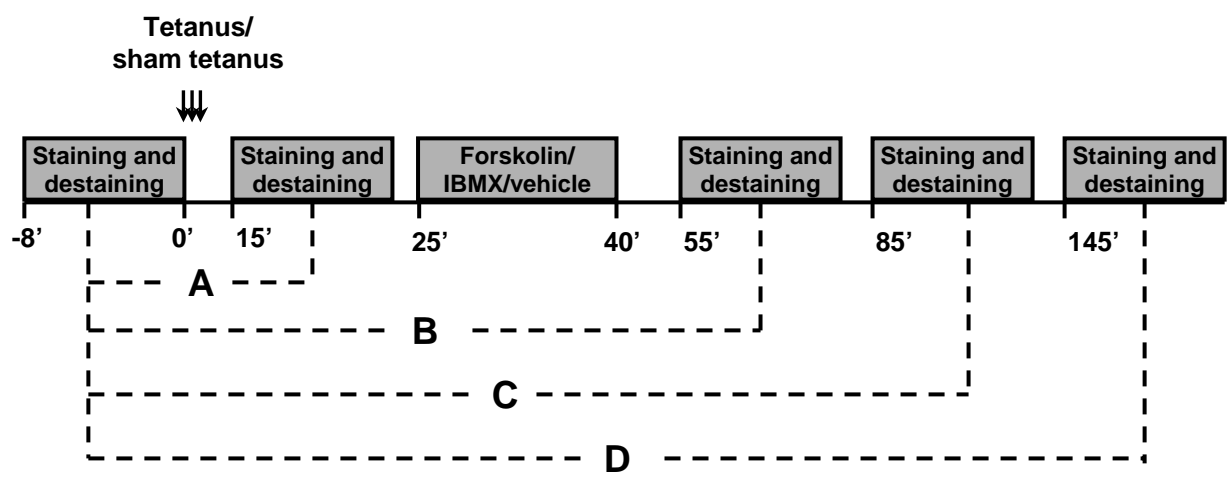**B**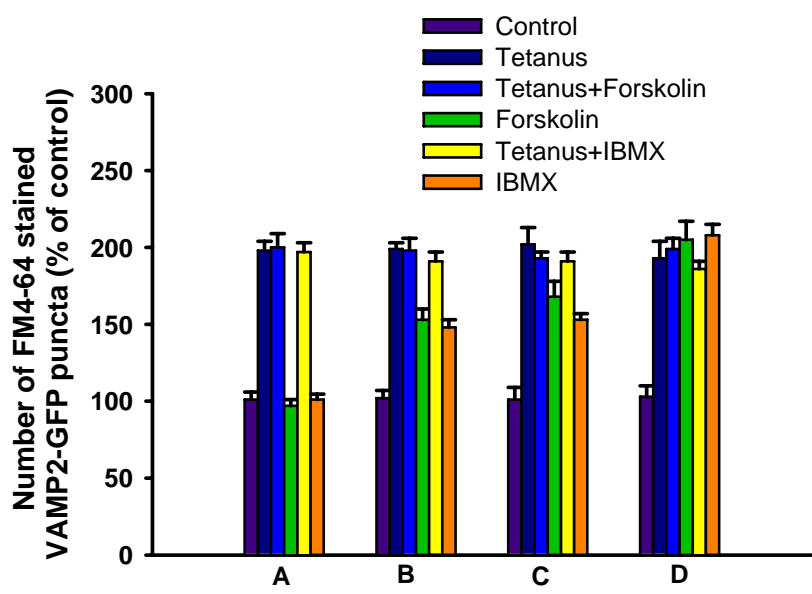**C**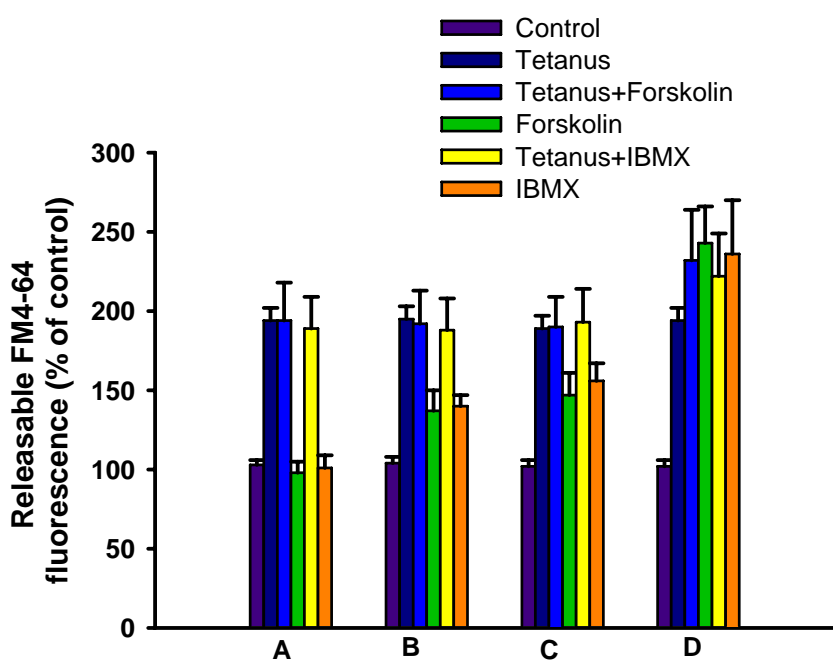

**A**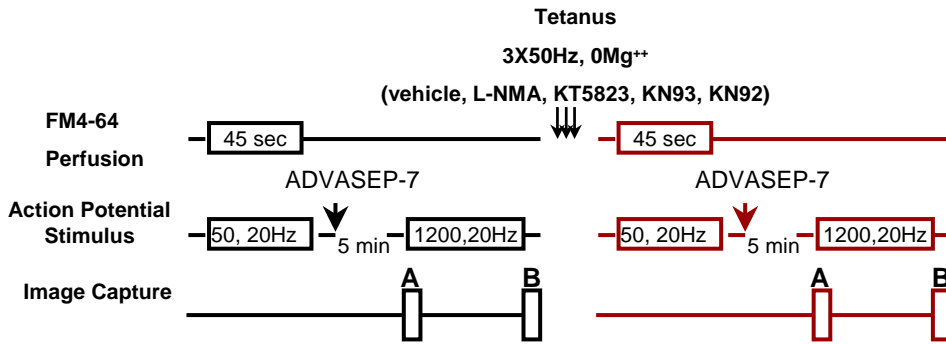**B**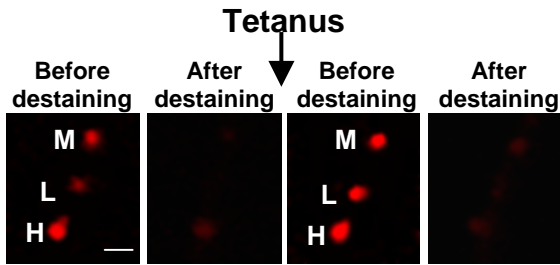**C**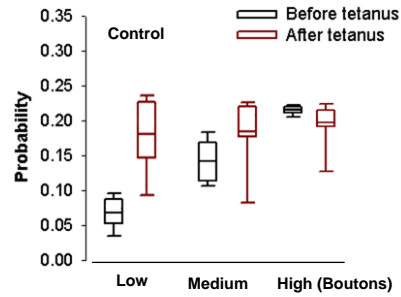**D**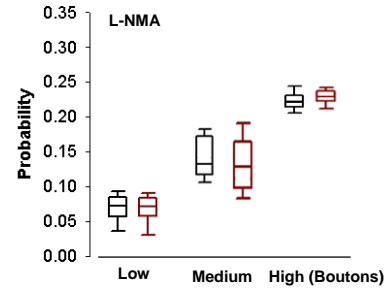**E**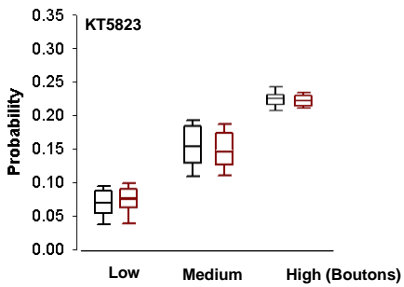**F**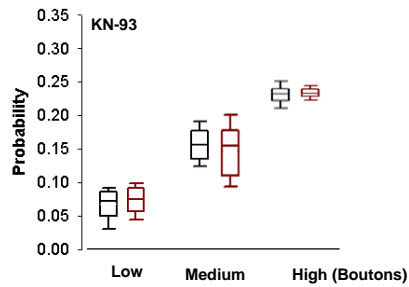**G**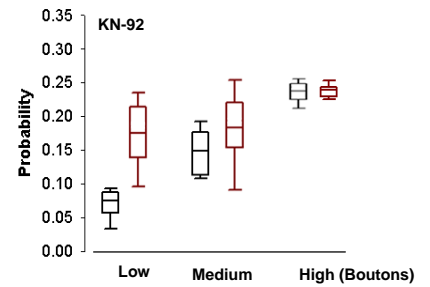

**A**

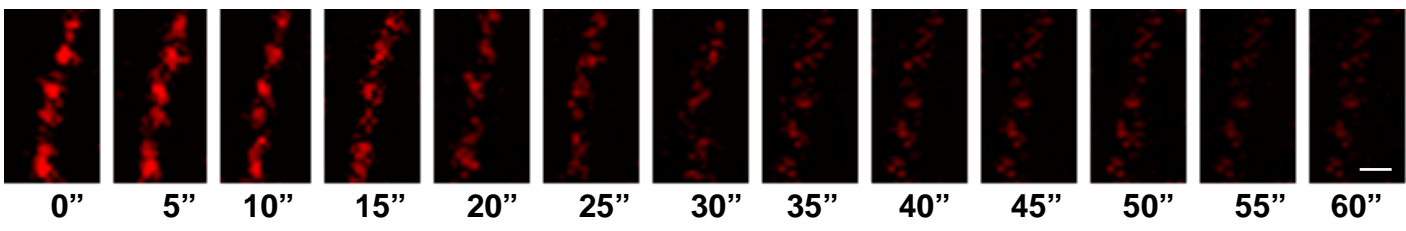

**B**

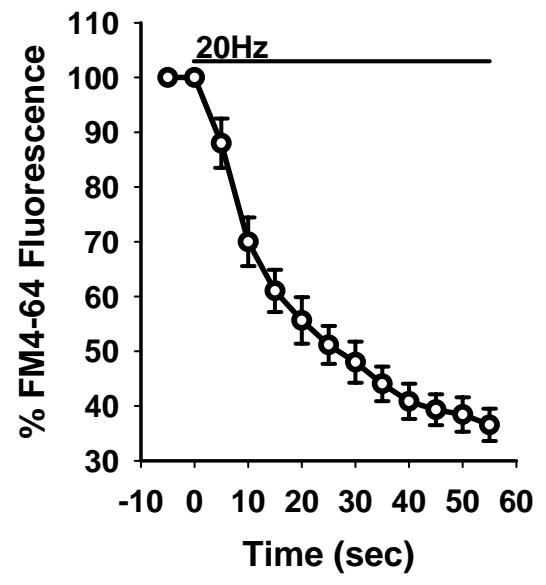

Supplement: 7601318s2.pdf [file 7601318s2.pdf]
